# Supplementary material
Source: Springer Nature journal article supplement (https://mijn.bsl.nl/resource/supplementary/13047_2011_460_MOESM5_ESM.pdf/7111726)

**95% CI NORMALSHOE**

285  
280  
275  
270  
265  
260

Non – diabetic participants

Diabetic participants

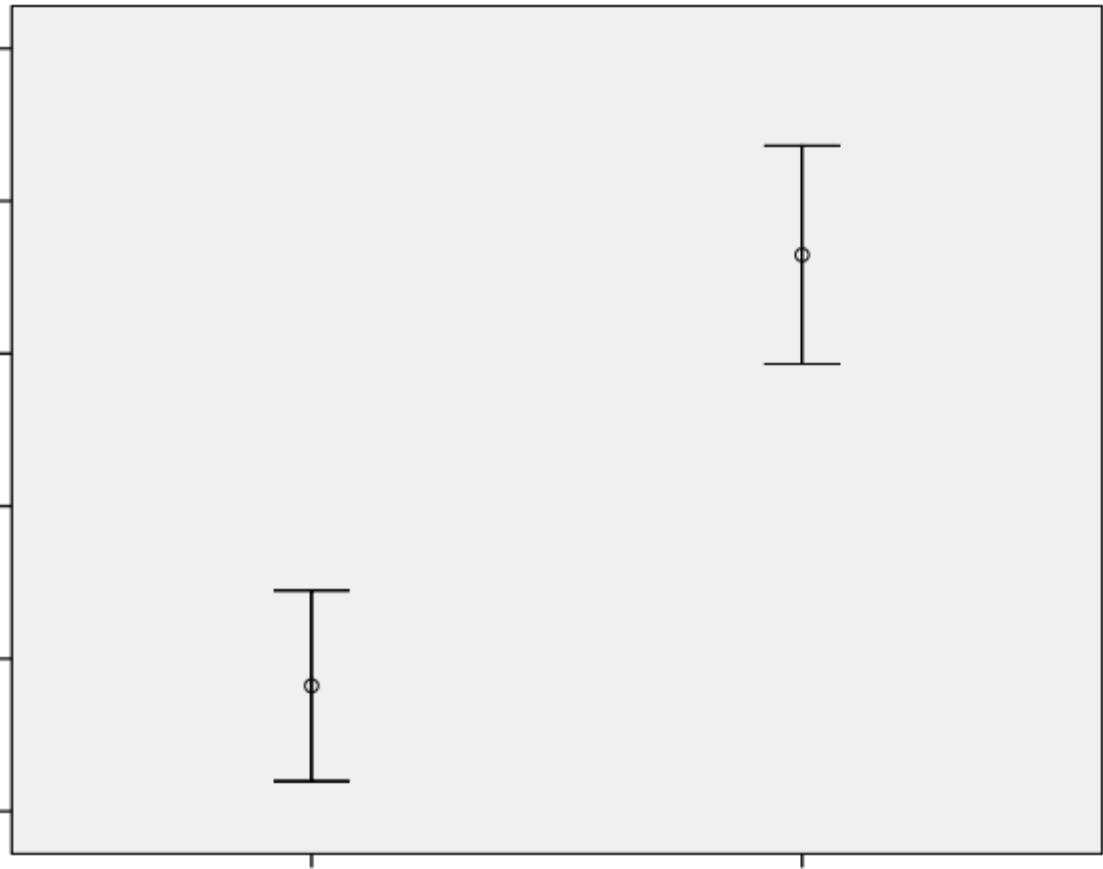

Supplement: MOESM5 [file 7111726]
